# Supplementary material for: PedVacc 002: A phase I/II randomized clinical trial of MVA.HIVA vaccine administered to infants born to human immunodeficiency virus type 1-positive mothers in Nairobi
Source: PubMed Central journal article supplement (PMC4414927; doi:10.1016/j.vaccine.2014.08.034), 2014-10-07
Supplement: mmc1.pdf [file mmc1.pdf]

**Table S1.** Fresh *ex-vivo* IFN- $\gamma$  ELISPOT responses

|                   |                | <b>Week 19</b>          | <b>Week 21</b>           | <b>Week 28</b>  | <b>Week 36</b>   | <b>Week 48</b>   |
|-------------------|----------------|-------------------------|--------------------------|-----------------|------------------|------------------|
| <b>Mock</b>       | <b>Vaccine</b> | 0 (0, 1.7)              | 5 (0, 11.7)              | 1.7 (0, 3.3)    | 1.7 (0, 5)       | 0 (0, 5)         |
|                   | <b>Control</b> | 0 (0, 1.7)              | 0.8 (0, 2.5)             | 0 (0, 1.7)      | 0 (0, 1.7)       | 1.7 (0, 3.3)     |
| <b>PHA</b>        | <b>Vaccine</b> | 635 (355, 1833)         | 770 (243, 2182)          | 858 (535, 1940) | 1063 (710, 1953) | 1323 (700, 2285) |
|                   | <b>Control</b> | 1008 (438,1213)         | 505 (185.8, 1290)        | 443 (238, 1670) | 1275 (750, 2110) | 648 (282, 1768)  |
| <b>PE</b>         | <b>Vaccine</b> | 0 (-1.7,.0)             | 0.8 (0, 3.3)             | 0 (-1.7, 3.3)   | 0 (-1.7, 3.3)    | 0 (0, 1.7)       |
|                   | <b>Control</b> | 0 (0, 2.5) <sup>a</sup> | 0 (-1.7, 0) <sup>b</sup> | 0 (-1.7, 1.7)   | 0 (0, 1.7)       | 0 (-1.7, 1.7)    |
| <b>p24/p17</b>    | <b>Vaccine</b> | 0 (-1.7, 1.7)           | 1.7 (-1.7, 6.7)          | -0.8 (-1.7,1.7) | 0 (-1.7, 1.7)    | 0 (-1.7, 1.7)    |
|                   | <b>Control</b> | 0 (0, 0)                | 0 (-1.7, 0) <sup>c</sup> | 0 (-1.7, 0)     | 0 (-1.7, 0)      | 0 (-1.7, 0)      |
| <b>PE+p24/p17</b> | <b>Vaccine</b> | 0 (-3.3, 1.7)           | 4.2 (0, 8.3)             | 0 (-3.3, 5)     | 0 (-3.3, 5)      | 0 (-1.7, 3.3)    |
|                   | <b>Control</b> | 0 (0, 3.3)              | 0 (-1.7, 0) <sup>d</sup> | 0 (-1.7, 1.7)   | 0 (0, 2.5)       | 0 (-3.3, 1.7)    |

a - p = 0.053; b - p = 0.069; c - p = 0.035; d - p = 0.002

Median values expressed as SFU/10<sup>6</sup> PBMC are shown with IQR in brackets. Responses to the polyepitope (PE) and Gag p24/p17 regions of the HIVA immunogen, and the PHA positive control are reported as net values, i.e. after subtraction of background. The raw no-peptide “Mock” background values are also shown. Note, that infants and adults have typically 15 x 10<sup>6</sup> and 1 x 10<sup>6</sup> PBMC per 1 ml of peripheral blood, respectively.
